# Supplementary material for: Higher hemoglobin levels using darbepoetin alfa and kidney outcomes in advanced chronic kidney disease without diabetes: a prespecified secondary analysis of the PREDICT trial
Source: Springer Nature journal article supplement (doi:10.1007/s10157-023-02362-w), 2023-06-08

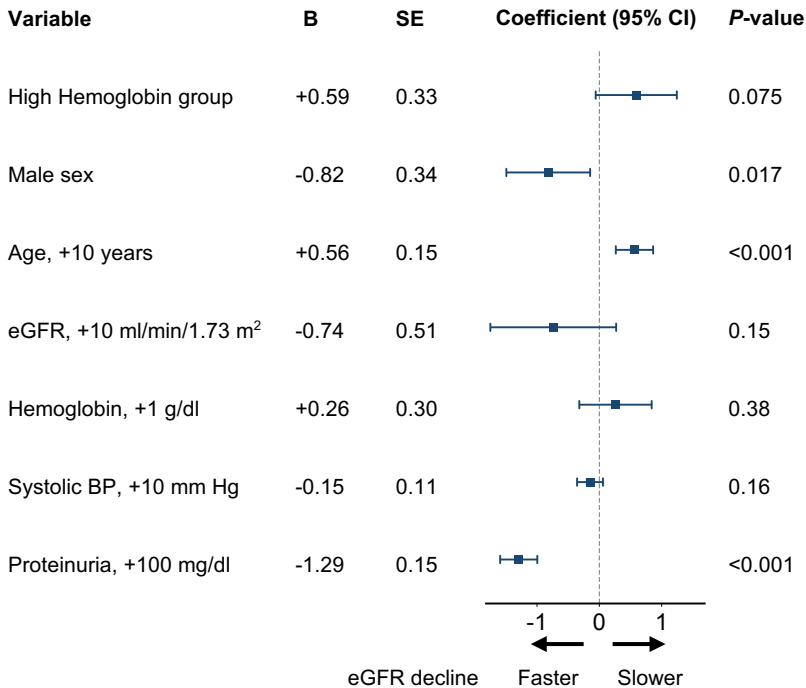

Supplement: MOESM3 [file 25463634]
